# Supplementary material for: The efficacy and safety of concentrated herbal extract granules, YH1, as an add-on medication in poorly controlled type 2 diabetes: A randomized, double-blind, placebo-controlled pilot trial
Source: PubMed Central journal article supplement (PMC6695147; doi:10.1371/journal.pone.0221199), 2019-08-15
Supplement: pone.0221199.s004.pdf [file pone.0221199.s004.pdf]

**S1 Table. Scores of TCM symptoms of diabetes and changes in scores**

**(A) Score of TCM symptoms of diabetes**

| Symptom                       | Mild ( 1point )                 | Moderate ( 2 point )                 | Severe ( 3 point )                                      |
|-------------------------------|---------------------------------|--------------------------------------|---------------------------------------------------------|
| Dry mouth and throat          | Occasionally                    | Some times                           | Often                                                   |
| Fatigue                       | Able to do daily work           | Hard to do daily work                | Unable to do daily work                                 |
| Polyphagia and easily hungry  | Only happen before meal         | Happen at any time                   | Happen at any time accompanied by hypoglycemia symptoms |
| Thirsty for drink             | Increased water intake <500ml   | 500ml<Increased water intake <1000ml | Increased water intake >1000ml                          |
| Short of breath, lazy to talk | Happen after heavy work         | Happen after daily work              | Happen at any time                                      |
| Vexation                      | Occasionally                    | Some times                           | Often                                                   |
| Feverish palms and soles      | Occasionally                    | Some times                           | Often                                                   |
| Palpitation                   | Occasionally                    | Some times                           | Often                                                   |
| Insomnia                      | 4h/day < Sleeping time < 6h/day | 2h/day < Sleeping time <4h/day       | Sleeping time <2h/day                                   |
| Constipation                  | Dry stool, defecate everyday    | Dry stool, defecate every 2-3days    | Dry stool, defecate >every 3 days                       |

Score as "0" if there are no symptoms

**(B) Change of scores in symptoms of polyphagia and easily hunger from baseline to week 12.**

|                   |    |    |   |   |   |
|-------------------|----|----|---|---|---|
| Change of scores  | -2 | -1 | 0 | 1 | 2 |
| YH1 group (n)     | 2  | 13 | 5 | 1 | 0 |
| Placebo group (n) | 0  | 11 | 8 | 1 | 0 |

No significant difference was noted between groups by Fisher's exact test ( $p$  value = 0.48).
