# Supplementary material for: The efficacy and safety of concentrated herbal extract granules, YH1, as an add-on medication in poorly controlled type 2 diabetes: A randomized, double-blind, placebo-controlled pilot trial
Source: PubMed Central journal article supplement (PMC6695147; doi:10.1371/journal.pone.0221199), 2019-08-15
Supplement: pone.0221199.s005.pdf [file pone.0221199.s005.pdf]

**S2 Table. Baseline classification of antidiabetic agents**

|                          | YH1 (n=21) | Placebo (n=20) |
|--------------------------|------------|----------------|
| Three antidiabetic drugs | 66.7 (14)  | 80 (16)        |
| M+SU+D                   | 42.9 (9)   | 25 (5)         |
| M+T+SG                   |            | 5 (1)          |
| M+A+SG                   | 4.8 (1)    |                |
| M+SU+SG                  | 14.3 (3)   | 35 (7)         |
| SU+T+SG                  |            | 5 (1)          |
| M+D+T                    |            | 5 (1)          |
| SU+A+SG                  | 4.8 (1)    | 5 (1)          |
| Four antidiabetic drugs  | 28.6 (6)   | 20 (4)         |
| M+SU+D+T                 |            | 10 (2)         |
| SU+D+T+SG                | 4.8 (1)    |                |
| M+SU+D+A                 | 19.0 (4)   | 5 (1)          |
| M+SU+D+SG                | 4.8 (1)    |                |
| M+SU+T+SG                |            | 5 (1)          |
| Five antidiabetic drugs  | 4.8 (1)    |                |
| M+SU+D+T+A               | 4.8 (1)    |                |

Data are presented as % (n) for categorical parameters.

M=metformin; SU= Sulfonylurea or Glinide; D= dipeptidyl peptidase 4 inhibitor; T= Thiazolidinediones; A= a-glucosidase inhibitor; SG= Sodium-glucose co-transporter-2 inhibitors
