# Supplementary material for: The efficacy and safety of concentrated herbal extract granules, YH1, as an add-on medication in poorly controlled type 2 diabetes: A randomized, double-blind, placebo-controlled pilot trial
Source: PubMed Central journal article supplement (PMC6695147; doi:10.1371/journal.pone.0221199), 2019-08-15
Supplement: pone.0221199.s006.pdf [file pone.0221199.s006.pdf]

**S3 Table. Medication adherence rate**

| Group | Patient No | Baseline to week 2 (package) | Week 3 to week 4 (package) | Week 5 to week 8 (package) | Week 9 to week 12 (package) | Total (package) | Calculated overall compliance (%) |
|-------|------------|------------------------------|----------------------------|----------------------------|-----------------------------|-----------------|-----------------------------------|
| B     | 1          | 84                           | 84                         | 156                        | 166                         | 490             | 97.2                              |
| A     | 2          | 84                           | 84                         | 168                        | 168                         | 504             | 100.0                             |
| A     | 3          | 84                           | 84                         | 168                        | 168                         | 504             | 100.0                             |
| B     | 4          | 84                           | 84                         | 168                        | 94                          | 430             | 85.3                              |
| B     | 5          | 84                           | 84                         | 168                        | 168                         | 504             | 100.0                             |
| A     | 6          | 76                           | 78                         | 134                        | 128                         | 416             | 82.5                              |
| B     | 7          | 53                           | 84                         | 158                        | 160                         | 455             | 90.3                              |
| A     | 8          | 74                           | 66                         | 124                        | 158                         | 422             | 83.7                              |
| A     | 10         | 84                           | 84                         | 156                        | 158                         | 482             | 95.6                              |
| B     | 11         | 82                           | 84                         | 166                        | 162                         | 494             | 98.0                              |
| B     | 12         | 82                           | 82                         | 166                        | 168                         | 498             | 98.8                              |
| B     | 13         | 84                           | 84                         | 162                        | 164                         | 494             | 98.0                              |
| B     | 14         | 84                           | 66                         | 156                        | 168                         | 474             | 94.0                              |
| A     | 15         | 84                           | 82                         | 164                        | 168                         | 498             | 98.8                              |
| A     | 16         | 80                           | 84                         | 168                        | 168                         | 500             | 99.2                              |
| B     | 17         | 72                           | 84                         | 168                        | 158                         | 482             | 95.6                              |
| B     | 18         | 84                           | 82                         | 166                        | 162                         | 494             | 98.0                              |
| A     | 19         | 68                           | 82                         | 138                        | 143                         | 431             | 85.5                              |
| A     | 20         | 60                           | 84                         | 156                        | 137                         | 437             | 86.7                              |
| B     | 21         | 70                           | 80                         | 130                        | 136                         | 416             | 82.5                              |
| B     | 22         | 72                           | 58                         | 158                        | 154                         | 442             | 87.7                              |
| A     | 23         | 84                           | 80                         | 168                        | 168                         | 500             | 99.2                              |
| A     | 24         | 84                           | 84                         | 168                        | 164                         | 500             | 99.2                              |
| A     | 25         | 84                           | 82                         | 156                        | 160                         | 482             | 95.6                              |
| A     | 26         | 77                           | 84                         | 156                        | 162                         | 479             | 95.0                              |
| B     | 27         | 82                           | 82                         | 156                        | 138                         | 458             | 90.9                              |
| B     | 28         | 78                           | 82                         | 154                        | 168                         | 482             | 95.6                              |
| B     | 30         | 76                           | 82                         | 168                        | 168                         | 494             | 98.0                              |
| A     | 31         | 78                           | 82                         | 162                        | 160                         | 482             | 95.6                              |
| A     | 32         | 76                           | 82                         | 158                        | 160                         | 476             | 94.4                              |
| B     | 34         | 84                           | 84                         | 168                        | 168                         | 504             | 100.0                             |
| A     | 35         | 76                           | 78                         | 142                        | 142                         | 438             | 86.9                              |
| A     | 36         | 78                           | 78                         | 166                        | 162                         | 484             | 96.0                              |
| A     | 37         | 76                           | 74                         | 167                        | 156                         | 473             | 93.8                              |

|   |    |    |    |     |     |     |       |
|---|----|----|----|-----|-----|-----|-------|
| B | 38 | 80 | 84 | 168 | 168 | 500 | 99.2  |
| B | 39 | 84 | 84 | 168 | 168 | 504 | 100.0 |
| A | 40 | 84 | 84 | 168 | 168 | 504 | 100.0 |
| A | 41 | 84 | 81 | 168 | 168 | 501 | 99.4  |
| B | 43 | 78 | 72 | 163 | 162 | 475 | 94.2  |
| B | 44 | 80 | 84 | 166 | 168 | 498 | 98.8  |
| A | 46 | 84 | 72 | 165 | 153 | 474 | 94.0  |
